# Supplementary material for: An effective antibiofilm strategy based on bacteriophages armed with silver nanoparticles
Source: PubMed Central journal article supplement (PMC11032367; doi:10.1038/s41598-024-59866-y), 2024-04-20
Supplement: 41598_2024_59866_MOESM1_ESM.pdf [file 41598_2024_59866_MOESM1_ESM.pdf]

## Supplementary Information

An effective antibiofilm strategy based on bacteriophages armed with silver nanoparticles

Mateusz Szymczak<sup>1</sup>, Jarosław A. Pankowski<sup>1,2</sup>, Agnieszka Kwiatek<sup>1</sup>, Bartłomiej Grygorcewicz<sup>1</sup>, Joanna Karczewska-Golec<sup>1</sup>, Kamila Sadowska<sup>3</sup> and Piotr Golec<sup>1,\*</sup>

<sup>1</sup> Department of Molecular Virology, Institute of Microbiology, Faculty of Biology, University of Warsaw, Miecznikowa 1, 02-096 Warsaw, Poland

<sup>2</sup> Dioscuri Centre for Physics and Chemistry of Bacteria, Institute of Physical Chemistry, Polish Academy of Sciences, Kasprzaka 44/52, 01-224 Warsaw, Poland

<sup>3</sup> Nalecz Institute of Biocybernetics and Biomedical Engineering, Polish Academy of Sciences, Ks. Trojdena 4, 02-109 Warsaw, Poland

\* Corresponding author: Piotr Golec  
University of Warsaw  
Faculty of Biology,  
Institute of Microbiology  
Department of Molecular Virology,  
Miecznikowa 1, 02-096 Warsaw, Poland  
Tel: 48 225541421  
Fax: 48 225541402  
E-mail: piotr.golec@uw.edu.pl

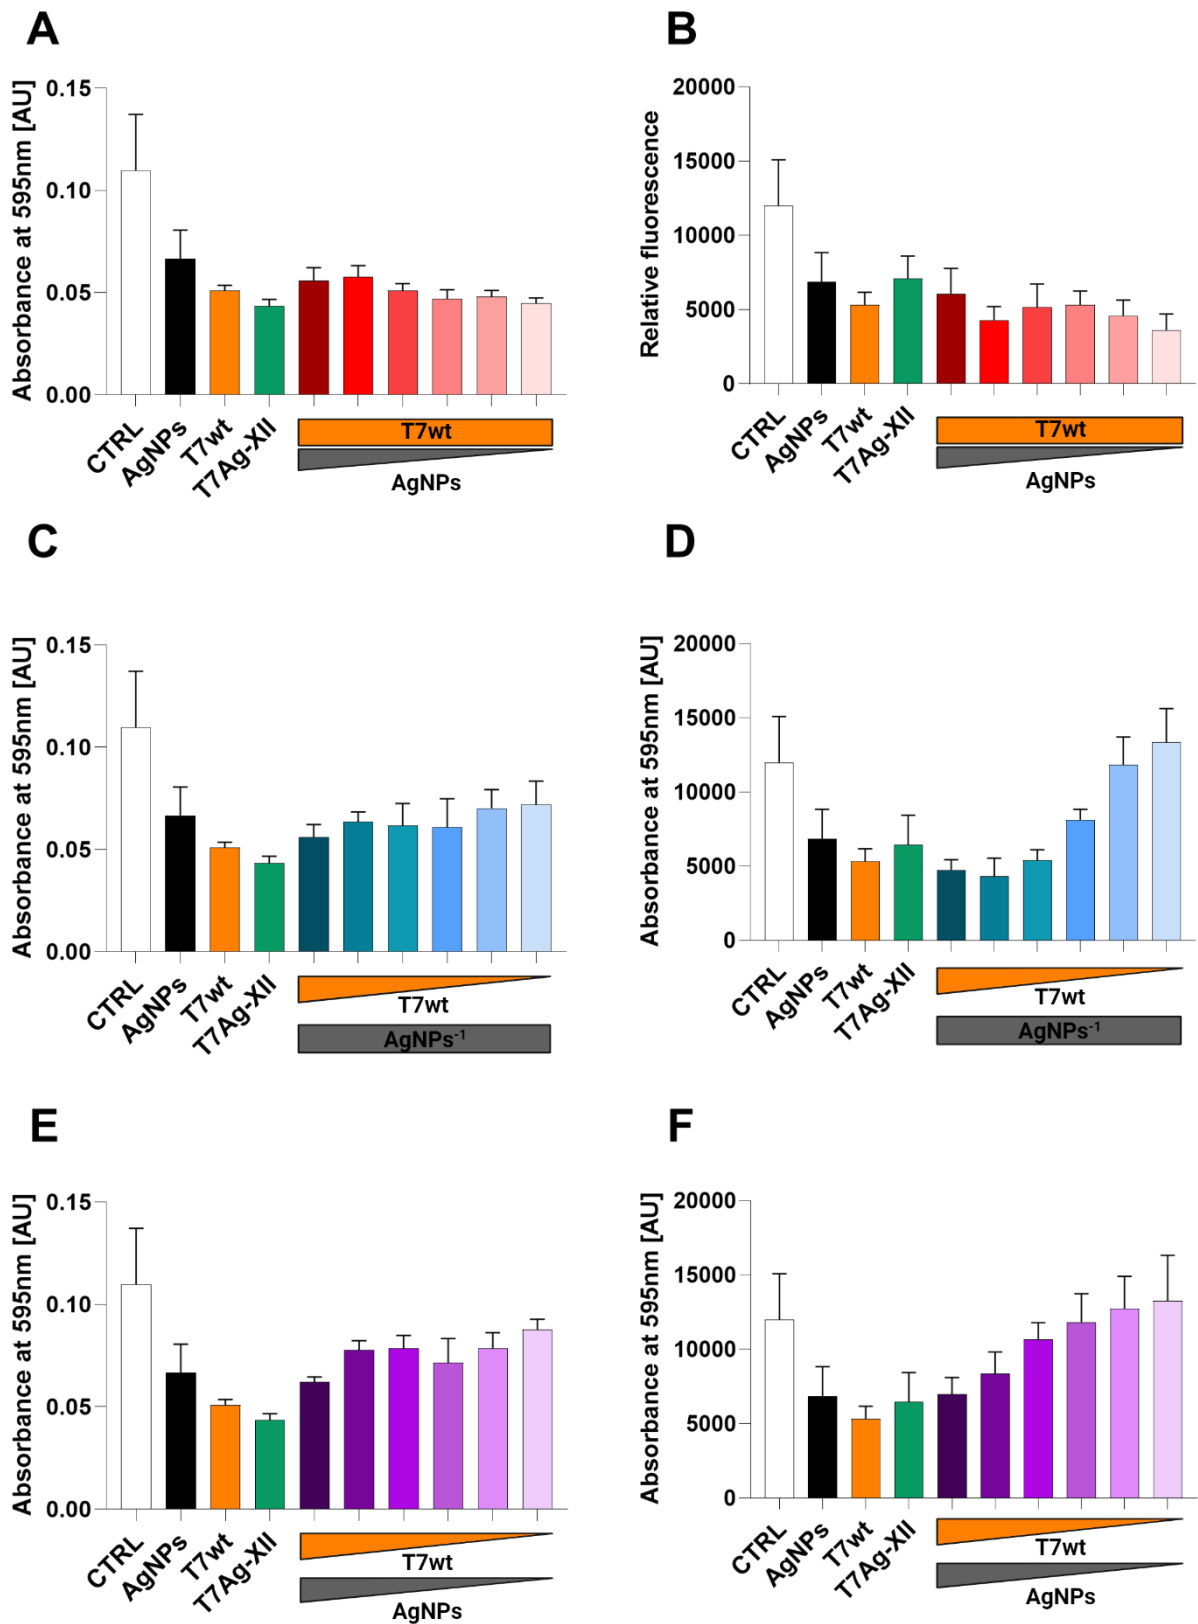

**Figure 1S.** Assessments of biofilms after treatment with a combination of T7wt phages and AgNPs. *Escherichia coli* biofilms were grown for 24 hours; incubated for 6 hours with

T7wt and T7Ag-XII phages, or a combination of T7wt phages mixed with AgNPs; and subjected to analyses of biofilm biomass and bacterial viability. The working concentration of phages: T7wt and T7Ag-XII were kept at  $1 \times 10^9$  pfu/mL; the variations in T7wt phage working concentrations decreased by an order of magnitude from left to right as indicated by orange gradients (panels C, D, E and F: from  $1 \times 10^9$  pfu/mL to  $1 \times 10^4$  pfu/mL). The working concentration of AgNPs was 1 mg/mL; the variations in AgNP working concentrations decreased by an order of magnitude from left to right as indicated by grey gradients (panels A, B, E and F: from 1 mg/mL to 0.000001 mg/mL). Panels A, C, and E show measurements of biofilm biomass based on crystal violet staining; and B, D, and F show measurements of cell viability based on resazurin staining. Data are shown as mean values of  $\geq 3$  biological replicates. Statistical analysis (one-way ANOVA) was carried out. There is no significantly higher efficiency of T7wt phages mixed with AgNPs in comparison with AgNPs alone or T7wt alone. Abbreviations: AgNPs, silver nanoparticles; AU, absorbance units; CTRL, biofilm without phages or AgNPs treatment; T7Ag-XII, T7 phages displaying the RFEHPAVPRTEM peptide; T7wt, wild-type T7 phages.

**Table S1.** Amino acid sequences of AgNP-binding peptides displayed within the pIII protein in M13 phages after three rounds of biopanning.

| Clone name | Sequence      | pI <sup>a</sup> | MW [Da] |
|------------|---------------|-----------------|---------|
| Ag-I       | SWNDPFQPQYYS  | 3.80            | 1531.60 |
| Ag-XI      | LIWGSNMNLLPI  | 5.52            | 1370.67 |
| Ag-XII     | RFEHPAVPRTEM  | 6.76            | 1469.68 |
| Ag-XIV     | LPYSARTFFSEA  | 6.00            | 1388.54 |
| Ag-XV      | SYARVDLPEHIH  | 5.94            | 1436.59 |
| Ag-XVII    | PGDGTLSTRYNNY | 6.26            | 1356.41 |
| Ag-XVIII   | PWQQRPPDYHTD  | 5.22            | 1539.63 |

<sup>a</sup>Isoelectric point (pI) and molecular weight (MW) values were calculated using the Compute pI/MW tool available at <https://www.expasy.org/resources/compute-pi-mw>.
